# Supplementary material
Source: PubMed Central journal article supplement (PMC3396153)
Supplement: Supp_Data.pdf [file Supp_Data.pdf]

## Supplementary Data

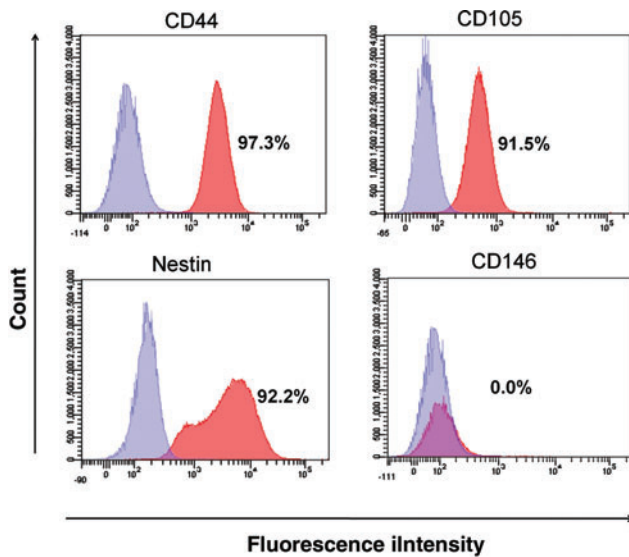

**SUPPLEMENTARY FIG. S1.** Flow cytometry analyses of DFCs. DFCs were positive for cell-surface markers CD 44, CD 105, and Nestin and negative for CD 146. The relative levels of cell surface expression are shown by the shift of the red histograms to the right compared with the fluorescence of the isotype-matched antibodies used as controls (blue histograms). The percentage of positive cells is indicated.

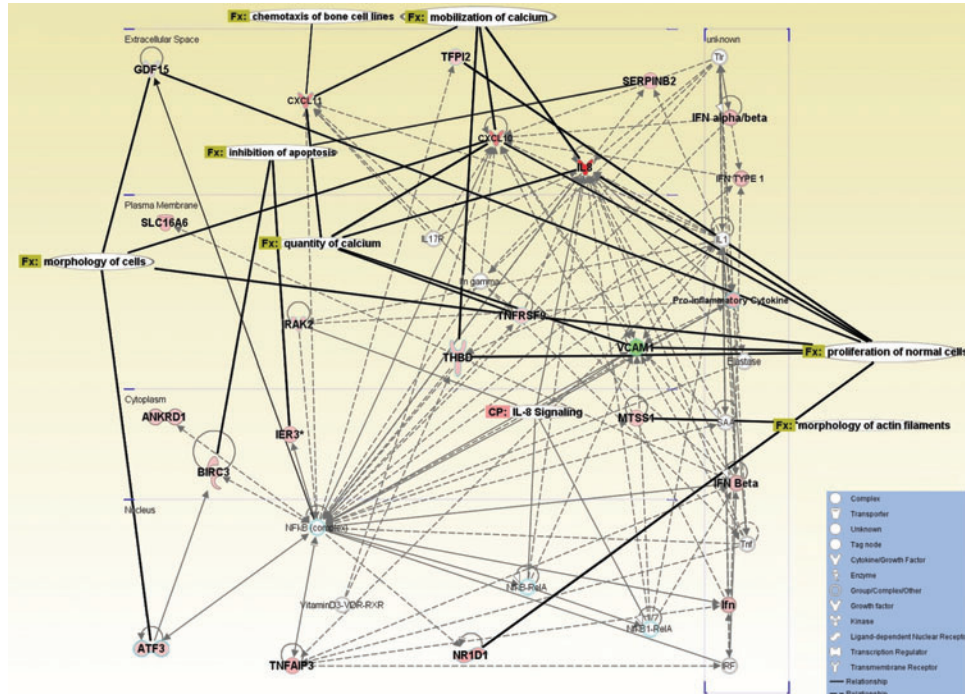

**SUPPLEMENTARY FIG. S2.** Ingenuity analysis. Network of pathways and biological processes induced after DLX3 over-expression in DFCs, generated through the use of Ingenuity Pathways Analysis (IPA; Ingenuity® Systems, <http://www.ingenuity.com>) using direct and indirect relationships between molecules. Direct interactions appear in the network diagram as a solid line (edge), whereas indirect interactions as a dashed line. All edges are supported by at least 1 reference from the literature, from a textbook, or from canonical information stored in the Ingenuity Pathways Knowledge Base. Molecules are represented as nodes. The intensity of the node color indicates the degree of up- (red) or down- (green) regulation. Nodes are displayed using various shapes that represent the functional class of the gene product. Fx: function. CP: canonical pathway.

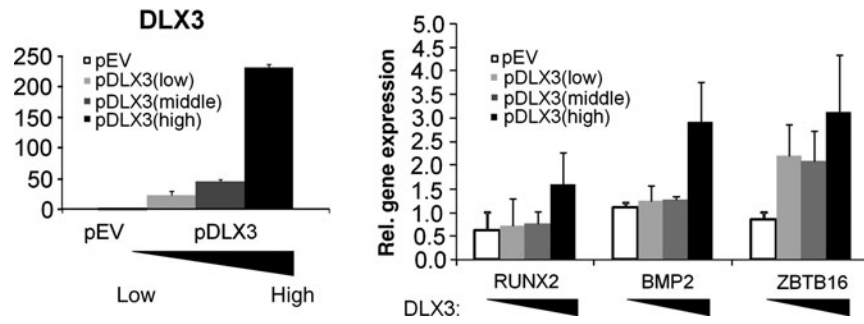

**SUPPLEMENTARY FIG. S3.** DLX3 influences the gene expression of osteogenic markers in a dose-dependent manner in DFCs. The gene expression of DLX3, RUNX2, BMP2, and ZBTB16 was determined by qRT-PCR analysis after 48 hours of transfection. Three different dilutions of the pDLX3 plasmid, for a low, middle, and high expression of DLX3, and the empty vector (pEV) were used for transfections.

SUPPLEMENTARY TABLE S1. REAL-TIME PCR PRIMERS

| <i>Gene</i>                                                          | <i>Forward 5' → 3'</i>  | <i>Reverse 5' → 3'</i>   | <i>Accession number</i> | <i>Probe number</i> |
|----------------------------------------------------------------------|-------------------------|--------------------------|-------------------------|---------------------|
| Distal-less homeobox 3 ( <i>DLX3</i> )                               | GAGCCTCCTACCCGGCAATAC   | TCCTCCTTCACCCGACACTG     | NM_005220.2             | 26                  |
| Collagen 3 ( <i>COL3A1</i> )                                         | CCGTGGTCCACAAGGATTAC    | GCCTGGTTCTCCAGGTTTT      | NM_000090.3             | SYBR green          |
| Hairy and enhancer of split 1, ( <i>Drosophila</i> ) ( <i>HES1</i> ) | AGTGAAGCACCTCCGGAAC     | CGTTCATGCACICCGCTGA      | NM_005524.3             | SYBR green          |
| Jun proto-oncogene ( <i>JUN</i> )                                    | CCAAAAGGATAGTGGGATGTTT  | CTGTCCCTCTCCCACTGCAAC    | NM_002228.3             | SYBR green          |
| Early growth response 1 ( <i>EGR1</i> )                              | AGCCCTACGACCTGAC        | GGTTTGGCTGGGGTAACTG      | NM_001964.2             | SYBR green          |
| Interleukin 8 ( <i>IL8</i> )                                         | CTTCCAAAGCTGGCCGTGGCTCT | TTCTCCACAACCCTCTGCACCCAG | NM_000584.2             | SYBR green          |
| Vascular cell adhesion molecule 1 ( <i>VCAM1</i> )                   | TGGAGGCTGGGAAGCCGATCAC  | GGGTCCAGGGGAGATCTCAACAG  | NM_001078.2             | SYBR green          |
| Integrin, alpha 8 ( <i>ITGA8</i> )                                   | AGGAGAAAAGCAGACGGAAGT   | CCCCAGCAGCAACTGAGTA      | NM_003638.1             | 78                  |
| Integrin, beta 8 ( <i>ITGB8</i> )                                    | CCATGGAAAATCTGTGTGCTG   | GGCCCTTTGAAATTGACACAG    | NM_002214.2             | 26                  |
| Zinc finger and BTB domain containing 16 ( <i>ZBTB16</i> )           | CAAGAAGTTCAGCCTCAAGCA   | CAC TCAAAGGGCTTCTCACC    | NM_006006.4             | 78                  |
| Bone sialoprotein ( <i>BSP</i> )                                     | ACTGCCAGAGGCTCACTCC     | TCATTTTGGTGATTGCTTCCCT   | NM_004967.2             | SYBR green          |
| Alkaline phosphatase ( <i>ALP</i> )                                  | CAACCCCTGGGAGGAGAC      | GCAITGGTGTGTACCGTCTTG    | NM_000478.3             | 19                  |
| Bone morphogenetic protein 2 ( <i>BMP2</i> )                         | CGGACTGCGGTCTCCTAA      | GGAAGCAGCAACGCTAGAAG     | NM_001200.2             | SYBR green          |
| Glyceraldehyde-3-phosphate-dehydrogenase ( <i>GAPDH</i> )            | AGCCACATCGCTCAGACAC     | GCCCAATACGACCAAATCC      | NM_002046               | SYBR green          |
| Runt-related transcription factor 2 ( <i>RUNX2</i> )                 | CACCATGTCAAGCAAAACTTCTT | TCACGTCGCTCATTTTGC       | NM_001015051.3          | SYBR green          |

SUPPLEMENTARY TABLE S2. GENES REGULATED AFTER DLX3 OVEREXPRESSION IN DFCs

| <i>Gene symbol</i> | <i>Gene name</i>                                                                    | <i>Log2 Ratio</i> |
|--------------------|-------------------------------------------------------------------------------------|-------------------|
| ODZ2               | Odz, odd Oz/ten-m homolog 2 ( <i>Drosophila</i> )                                   | -5.48             |
| PSAT1              | Phosphoserine aminotransferase 1                                                    | -3.70             |
| LOC100130876       | Hypothetical LOC100130876                                                           | -3.56             |
| C20orf103          | Chromosome 20 open reading frame 103                                                | -3.43             |
| HAPLN1             | Hyaluronan and proteoglycan link protein 1                                          | -3.34             |
| EFEMP1             | EGF-containing fibulin-like extracellular matrix protein 1                          | -3.01             |
| C4orf31            | Chromosome 4 open reading frame 31                                                  | -2.87             |
| SLC38A4            | Solute carrier family 38, member 4                                                  | -2.80             |
| PHGDH              | Phosphoglycerate dehydrogenase                                                      | -2.79             |
| SVEP1              | Sushi, von Willebrand factor type A, EGF and pentraxin domain containing 1          | -2.78             |
| ALDH1L2            | Aldehyde dehydrogenase 1 family, member L2                                          | -2.74             |
| SLC7A11            | Solute carrier family 7, (cationic amino acid transporter, y+ system) member 11     | -2.71             |
| C3                 | Complement component 3                                                              | -2.70             |
| SFRP4              | Secreted frizzled-related protein 4                                                 | -2.68             |
| SULF2              | Sulfatase 2                                                                         | -2.63             |
| FBN2               | Fibrillin 2                                                                         | -2.60             |
| ADRA2A             | Adrenergic, alpha-2A-, receptor                                                     | -2.59             |
| SLITRK6            | SLIT and NTRK-like family, member 6                                                 | -2.58             |
| PDE5A              | Phosphodiesterase 5A, cgmp-specific                                                 | -2.47             |
| FAM38B2            | Family with sequence similarity 38, member B2                                       | -2.45             |
| MFAP4              | Microfibrillar-associated protein 4                                                 | -2.45             |
| ASPEN              | Asporin                                                                             | -2.44             |
| TRIM16L            | Tripartite motif-containing 16-like                                                 | -2.43             |
| OR4F15             | Olfactory receptor, family 4, subfamily F, member 15                                | -2.41             |
| PCK2               | Phosphoenolpyruvate carboxykinase 2 (mitochondrial)                                 | -2.39             |
| CHRM2              | Cholinergic receptor, muscarinic 2                                                  | -2.35             |
| ACSS3              | Acyl-coa synthetase short-chain family member 3                                     | -2.34             |
| PTGIS              | Prostaglandin I2 (prostacyclin) synthase                                            | -2.31             |
| C4orf49            | Chromosome 4 open reading frame 49                                                  | -2.29             |
| GPRC5B             | G protein-coupled receptor, family C, group 5, member B                             | -2.27             |
| OLFML1             | Olfactomedin-like 1                                                                 | -2.27             |
| TOX                | Thymocyte selection-associated high mobility group box                              | -2.26             |
| GLT8D4             | Glycosyltransferase 8 domain containing 4                                           | -2.25             |
| C5orf36            | Chromosome 5 open reading frame 36                                                  | -2.24             |
| PLXNC1             | Plexin C1                                                                           | -2.23             |
| ITGB8              | Integrin, beta 8                                                                    | -2.23             |
| C5orf23            | Chromosome 5 open reading frame 23                                                  | -2.23             |
| ELN                | Elastin                                                                             | -2.21             |
| ASNS               | Asparagine synthetase                                                               | -2.20             |
| UNQ3028            | Tssp3028                                                                            | -2.20             |
| VCAM1              | Vascular cell adhesion molecule 1                                                   | -2.14             |
| EFHD1              | EF-hand domain family, member D1                                                    | -2.12             |
| MATN2              | Matrilin 2                                                                          | -2.10             |
| FNDC1              | Fibronectin type III domain containing 1                                            | -2.09             |
| SORBS2             | Sorbin and SH3 domain containing 2                                                  | -2.08             |
| WISP1              | WNT1 inducible signaling pathway protein 1                                          | -2.08             |
| OMD                | Osteomodulin                                                                        | -2.07             |
| F2RL2              | Coagulation factor II (thrombin) receptor-like 2                                    | -2.07             |
| ANGPT1             | Angiopoietin 1                                                                      | -2.07             |
| EFNA5              | Ephrin-A5                                                                           | -2.07             |
| CBS                | Cystathionine-beta-synthase                                                         | -2.05             |
| MNS1               | Meiosis-specific nuclear structural 1                                               | -2.05             |
| ITGA8              | Integrin, alpha 8                                                                   | -2.03             |
| SLC46A3            | Solute carrier family 46, member 3                                                  | -2.01             |
| COL3A1             | Collagen, type III, alpha 1                                                         | -2.00             |
| EGR1               | Early growth response 1                                                             | 2.02              |
| NFKBIA             | Nuclear factor of kappa light polypeptide gene enhancer in B-cells inhibitor, alpha | 2.02              |
| KRTAP2-4           | Keratin associated protein 2-4                                                      | 2.03              |
| KRTAP2-4           | Keratin associated protein 2-4                                                      | 2.03              |
| HES1               | Hairy and enhancer of split 1, ( <i>Drosophila</i> )                                | 2.04              |
| BMP2               | Bone morphogenetic protein 2                                                        | 2.05              |
| NR4A2              | Nuclear receptor subfamily 4, group A, member 2                                     | 2.06              |

(continued)

SUPPLEMENTARY TABLE S2. (CONTINUED)

| <i>Gene symbol</i> | <i>Gene name</i>                                                       | <i>Log2 Ratio</i> |
|--------------------|------------------------------------------------------------------------|-------------------|
| GDF15              | Growth differentiation factor 15                                       | 2.08              |
| CHST2              | Carbohydrate (N-acetylglucosamine-6-O) sulfotransferase 2              | 2.09              |
| SPRY4              | Sprouty homolog 4 ( <i>Drosophila</i> )                                | 2.12              |
| KRTAP4-9           | Keratin associated protein 4-9                                         | 2.15              |
| VEGFA              | Vascular endothelial growth factor A                                   | 2.16              |
| HIST2H4A           | Histone cluster 2, H4a                                                 | 2.16              |
| HIST2H4A           | Histone cluster 2, H4a                                                 | 2.16              |
| GPRC5A             | G protein-coupled receptor, family C, group 5, member A                | 2.17              |
| SLC20A1            | Solute carrier family 20 (phosphate transporter), member 1             | 2.18              |
| PLAT               | Plasminogen activator, tissue                                          | 2.19              |
| TM4SF1             | Transmembrane 4 L six family member 1                                  | 2.21              |
| TNFRSF9            | Tumor necrosis factor receptor superfamily, member 9                   | 2.21              |
| TIPARP             | TCDD-inducible poly(ADP-ribose) polymerase                             | 2.21              |
| NPTX1              | Neuronal pentraxin I                                                   | 2.21              |
| LOC554202          | Hypothetical LOC554202                                                 | 2.26              |
| BHLHE41            | Basic helix-loop-helix family, member e41                              | 2.26              |
| TFPI2              | Tissue factor pathway inhibitor 2                                      | 2.27              |
| KRTAP4-11          | Keratin associated protein 4-11                                        | 2.31              |
| KRTAP2-1           | Keratin associated protein 2-1                                         | 2.32              |
| KRTAP2-1           | Keratin associated protein 2-1                                         | 2.33              |
| PLAU               | Plasminogen activator, urokinase                                       | 2.33              |
| KRTAP2-4           | Keratin associated protein 2-4                                         | 2.33              |
| KRTAP2-4           | Keratin associated protein 2-4                                         | 2.33              |
| SCG2               | Secretogranin II (chromogranin C)                                      | 2.33              |
| C3orf59            | Chromosome 3 open reading frame 59                                     | 2.34              |
| ATF3               | Activating transcription factor 3                                      | 2.36              |
| GADD45A            | Growth arrest and DNA-damage-inducible, alpha                          | 2.36              |
| FZD8               | Frizzled homolog 8 ( <i>Drosophila</i> )                               | 2.37              |
| ANKRD1             | Ankyrin repeat domain 1 (cardiac muscle)                               | 2.37              |
| DUSP4              | Dual specificity phosphatase 4                                         | 2.39              |
| MTSS1              | Metastasis suppressor 1                                                | 2.41              |
| GPR56              | G protein-coupled receptor 56                                          | 2.42              |
| STC1               | Stanniocalcin 1                                                        | 2.47              |
| PRSS35             | Protease, serine, 35                                                   | 2.47              |
| BIRC3              | Baculoviral IAP repeat-containing 3                                    | 2.50              |
| JUN                | Jun oncogene                                                           | 2.52              |
| CDCP1              | CUB domain containing protein 1                                        | 2.53              |
| KRTAP4-8           | Keratin associated protein 4-8                                         | 2.57              |
| IER3               | Immediate early response 3                                             | 2.57              |
| PRDM1              | PR domain containing 1, with ZNF domain                                | 2.58              |
| SIK1               | Salt-inducible kinase 1                                                | 2.58              |
| SERPINB2           | Serpin peptidase inhibitor, clade B (ovalbumin), member 2              | 2.61              |
| IER3               | Immediate early response 3                                             | 2.61              |
| IER3               | Immediate early response 3                                             | 2.61              |
| ABCA13             | ATP-binding cassette, sub-family A (ABC1), member 13                   | 2.63              |
| DUSP6              | Dual specificity phosphatase 6                                         | 2.65              |
| IFNB1              | Interferon, beta 1, fibroblast                                         | 2.68              |
| KRTAP4-11          | Keratin associated protein 4-11                                        | 2.68              |
| ETS2               | V-ets erythroblastosis virus E26 oncogene homolog 2 (avian)            | 2.70              |
| SPRY2              | Sprouty homolog 2 ( <i>Drosophila</i> )                                | 2.75              |
| THBD               | Thrombomodulin                                                         | 2.77              |
| SLC16A6            | Solute carrier family 16, member 6 (monocarboxylic acid transporter 7) | 2.87              |
| IRAK2              | Interleukin-1 receptor-associated kinase 2                             | 2.88              |
| EREG               | Epiregulin                                                             | 2.94              |
| TMEM158            | Transmembrane protein 158                                              | 2.99              |
| RSPO3              | R-spondin 3 homolog ( <i>Xenopus laevis</i> )                          | 3.04              |
| CLDN1              | Claudin 1                                                              | 3.12              |
| TNFAIP3            | Tumor necrosis factor, alpha-induced protein 3                         | 3.15              |
| GEM                | GTP binding protein overexpressed in skeletal muscle                   | 3.25              |
| CCRN4L             | CCR4 carbon catabolite repression 4-like ( <i>S. Cerevisiae</i> )      | 3.25              |
| ACTN2              | Actinin, alpha 2                                                       | 3.29              |
| LIF                | Leukemia inhibitory factor (cholinergic differentiation factor)        | 3.33              |

(continued)

SUPPLEMENTARY TABLE S2. (CONTINUED)

| <i>Gene symbol</i> | <i>Gene name</i>                                      | <i>Log2 Ratio</i> |
|--------------------|-------------------------------------------------------|-------------------|
| <i>ESM1</i>        | Endothelial cell-specific molecule 1                  | 3.54              |
| <i>NR1D1</i>       | Nuclear receptor subfamily 1, group D, member 1       | 3.62              |
| <i>ANGPTL4</i>     | Angiopoietin-like 4                                   | 3.67              |
| <i>HBEGF</i>       | Heparin-binding EGF-like growth factor                | 4.05              |
| <i>MMP1</i>        | Matrix metalloproteinase 1 (interstitial collagenase) | 4.47              |
| <i>CXCL11</i>      | Chemokine (C-X-C motif) ligand 11                     | 4.94              |
| <i>CXCL10</i>      | Chemokine (C-X-C motif) ligand 10                     | 5.47              |
| <i>DLX3</i>        | Distal-less homeobox 3                                | 8.63              |
| <i>IL8</i>         | Interleukin 8                                         | 8.78              |

ADP, adenosine diphosphate; ATP, adenosine-5'-triphosphate; EGF, epidermal growth factor; NTRK, nonreceptor tyrosine kinase; TCDD, 2,3,7,8-tetrachlorodibenzodioxin; ZNF, zinc finger.

SUPPLEMENTARY TABLE S3. TOP MOLECULAR AND CELLULAR FUNCTIONS AFTER DLX3 OVEREXPRESSION IN DFCs

| <i>Name</i>                            | <i>P value</i>                                | <i>No. Molecules</i> |
|----------------------------------------|-----------------------------------------------|----------------------|
| Cellular growth and proliferation      | $2.18 \times 10^{-12} - 6.08 \times 10^{-14}$ | 50                   |
| Cellular development                   | $1.79 \times 10^{-11} - 7.47 \times 10^{-4}$  | 51                   |
| Cellular movement                      | $7.48 \times 10^{-11} - 7.55 \times 10^{-4}$  | 45                   |
| Cell death                             | $1.90 \times 10^{-9} - 7.73 \times 10^{-4}$   | 53                   |
| Cell-to-cell signaling and interaction | $7.30 \times 10^{-9} - 7.55 \times 10^{-4}$   | 40                   |

SUPPLEMENTARY TABLE S4. TOP PHYSIOLOGICAL SYSTEM DEVELOPMENT AND FUNCTIONS AFTER DLX3 OVEREXPRESSION IN DFCs

| <i>Name</i>                                           | <i>P value</i>                              | <i>No. Molecules</i> |
|-------------------------------------------------------|---------------------------------------------|----------------------|
| Tissue development                                    | $5.40 \times 10^{-9} - 7.47 \times 10^{-4}$ | 41                   |
| Cardiovascular system development and function        | $1.54 \times 10^{-8} - 7.55 \times 10^{-4}$ | 31                   |
| Organismal development                                | $1.54 \times 10^{-8} - 7.55 \times 10^{-4}$ | 35                   |
| Organismal survival                                   | $2.38 \times 10^{-8} - 2.01 \times 10^{-5}$ | 31                   |
| Skeletal and muscular system development and function | $4.04 \times 10^{-8} - 6.70 \times 10^{-4}$ | 18                   |
